# Supplementary material for: Comprehensive analyses of imprinted differentially methylated regions reveal epigenetic and genetic characteristics in hepatoblastoma
Source: BMC Cancer. 2013 Dec 27;13:608. doi: 10.1186/1471-2407-13-608 (PMC3880457; doi:10.1186/1471-2407-13-608)
Supplement: Additional file 1: Table S1 — Primers used for this study. [file 1471-2407-13-608-S1.xls]

## Sheet: sup tab1
Table S1 Primers used for this study
Analysis	Locus	Primer name	Primer sequence					rs number
MALDI-TOF MS	ARHI-CG1	ARHI-CG1rev-3_10F	aggaagagagGGGTTGAGGGTTTGGTTTTAGTAGT
		ARHI-CG1rev-3_T7R	cagtaatacgactcactatagggagaaggctCACACACCCTAACCTCAACTAAC
	ARHI-CG2	ARHICpG2_10F	aggaagagagGAAAGATTTGGTTTTAGTTTTAGGGA
		ARHICpG2_T7R	cagtaatacgactcactatagggagaaggctCAACCCCTCACAACTAATTTCTTAC
	TP73	TP73_000_10F	aggaagagagATAGGAGAAGTGGGTGGTAAGTTTT
		TP73_000_T7R	cagtaatacgactcactatagggagaaggctAACTCCCTACTATCCCCCAAAC
	SPTBN1	SPTBN1_000_10F	aggaagagagTAAATGGTAGTTTTTTTGGAGTGGA
		SPTBN1_000_T7R	cagtaatacgactcactatagggagaaggctTAAACTCTCTTACAACCAACTTCCC
	ZDBF2	ZDBF2_10F	aggaagagagTTTGTTTTTTAATGGTTTTGTTTGA
		ZDBF2_T7R	cagtaatacgactcactatagggagaaggctTCTTAAACTAACTAAAAATCCTCTTCC
	NAP1L5	NAP1L5_000_10F	aggaagagagGGTTTGGGGTTTTTTAGTTATTTGA
		NAP1L5_000_T7R	cagtaatacgactcactatagggagaaggctACTACTAACACTCCCAACCCAACTC
	ZAC	ZAC_000_10F	aggaagagagTTGGAAGAAGGAGGATTTAAGTTG
		ZAC_000_T7R	cagtaatacgactcactatagggagaaggctCCTATCTAATATAAAATCCACAAACCC
	IGF2R-DMR2	IGF2R-DMR2_000_10F	aggaagagagTTAATGTGGTTTTAAGGAGGTTTTG
		IGF2R-DMR2_000_T7R	cagtaatacgactcactatagggagaaggctATTTCCTAACAAATTCAAAAACCAA
	PEG10	PEG10-_000_10F	aggaagagagGGTTTTTTTATTTGTTTTGGGGTAT
		PEG10-_000_T7R	cagtaatacgactcactatagggagaaggctTATAAAACCCCATCCTTCCTATCTT
	MEST	PEG1_001_10F	aggaagagagGTTTATTTGAGGAGGGGGTGTTAT
		PEG1_001_T7R	cagtaatacgactcactatagggagaaggctAATCTAAATATCCTAAATCAAACCAAAA
	INPP5Fv2	INPP5F-V2_000_10F	aggaagagagAAATATTTGGTGGAAAAATAGGTAAGT
		INPP5F-V2_000_T7R	cagtaatacgactcactatagggagaaggctAACCACTCCATTACCACTACTAAACC
	H19-Promoter	H19promoter_001_10F	aggaagagagGTGAATTTTAGGGATTGTAGGGTTT
		H19promoter_001_T7R	cagtaatacgactcactatagggagaaggctAATAACACAAAAAACCCCTTCCTA
	H19-DMR	H19DMR_002_10F	aggaagagagTATGGGTATTTTTGGAGGTTTTTTT
		H19DMR_002_T7R	cagtaatacgactcactatagggagaaggctAACTTAAATCCCAAACCATAACACT
	IGF2-DMR0	hIGF2-DMR0_000_10F	aggaagagagGAGGGGGTTTATTTTTTTAGGAAGT
		hIGF2-DMR0_000_T7R	cagtaatacgactcactatagggagaaggctTCCTTCAAATCACCTTATCAAAATC
	IGF2-DMR2	IGF2-DMR2_000_10F	aggaagagagATGTTTGAAGATGTTGTTGTGTTTT
		IGF2-DMR2_000_T7R	cagtaatacgactcactatagggagaaggctACAAACACCTACTAACCAACCCCT
	KvDMR1	DMRLIT1_000_10F	aggaagagagTAGGATTTTGTTGAGGAGTTTTTTG
		DMRLIT1_000_T7R	cagtaatacgactcactatagggagaaggctAATAACATCAAAACCAAACTCTTTC
	WT1-AS	WT1-AS_10F	aggaagagagATTTAAAGTTTTAAGAGGGTGGTGG
		WT1-AS_T7R	cagtaatacgactcactatagggagaaggctTCCTACCTTAACCTAACCAAAAACA
	RB1	RB1_000_10F	aggaagagagTTTAGGTGGTGGTTTTGGTAGTTAG
		RB1_000_T7R	cagtaatacgactcactatagggagaaggctTAACTTACTTTCCCCTTCTCAAAAC
	DLK1	DLK1_10F	aggaagagagTTTTTATGGTTAGGGGTATAGGGG
		DLK1_T7R	cagtaatacgactcactatagggagaaggctACATACAAACCTACCTAAAACAAATC
	IG-DMR-CG4	IG-DMR-CpG4_000_10F	aggaagagagGTAGTTTTGTAAAGTTTGTTGGGGA
		IG-DMR-CpG4_000_T7R	cagtaatacgactcactatagggagaaggctACAAATCAAAACAACTCAAATCCTT
	IG-DMR-CG6	IG-DMR-CG6_000_10F	aggaagagagGTTTATTGGGTTGGGTTTTGTTAGT
		IG-DMR-CG6_000_T7R	cagtaatacgactcactatagggagaaggctACAATTTAACAACAACTTTCCTCCA
	MEG3-CG7	MEG3-CG7-2-_000_10F	aggaagagagTTGTGTTTGAATTTATTTTGTTTGG
		MEG3-CG7-2-_000_T7R	cagtaatacgactcactatagggagaaggctACAAAAATAACCAACCACTCACC
	SNRPN	SNRPN_000_10F	aggaagagagTGTAATAGTGTTGTGGGGTTTTAGG
		SNRPN_000_T7R	cagtaatacgactcactatagggagaaggctCCCAAACTATCTCTTAAAAAAAACCA
	TCEB3C	TCEB3CCpG_000_10F	aggaagagagTTTTTTGAAGTTTTGGAGGTAATGA
		TCEB3CCpG_000_T7R	cagtaatacgactcactatagggagaaggctCCAAAAAAACCAATCAAAAAAACTA
	PEG3	PEG3_000_10F	aggaagagagGGAGATGTTTATTTTGGGTTGGT
		PEG3_000_T7R	cagtaatacgactcactatagggagaaggctACCCTACAACAACCCCTCAAAC
	USP29	USP29_10F	aggaagagagTTAGTATTTTGGGGTTTTATTGGGT
		USP29_T7R	cagtaatacgactcactatagggagaaggctCCCAAATACAATCATTTATAACCCT
	MCTS2	MCTS2-CG_000_10F	aggaagagagTTGTTTAGTTAGAAGGAAGGAGAGG
		MCTS2-CG_000_T7R	cagtaatacgactcactatagggagaaggctCATCAAACTTCTTAAACATAATCCAAA
	NNAT	NNAT_000_10F	aggaagagagGATTTATTAGGGTTTGGGGGAG
		NNAT_000_T7R	cagtaatacgactcactatagggagaaggctTTTTAAACCCAAATCCTCTACTTCA
	L3MBTL	L3MBTL-CpG3-_000_10F	aggaagagagAGTTTTTAGGGTTTAGGAGTGTTTT
		L3MBTL-CpG3-_000_T7R	cagtaatacgactcactatagggagaaggctCCTTCACATACCTACACATACATAACC
	NESP	000_NESP55_2_000_10F	aggaagagagGGAGTTATTTTTTGTAGAGTTAGAGGGT
		NESP55_000_T7R	cagtaatacgactcactatagggagaaggctAAAACAACTCAAAATCTACCTCCTC
	NESPAS	NESPAS-GNASXL_000_10F	aggaagagagTTGTGGTATGAGGAAGAGTGATTTT
		NESPAS-GNASXL_000_T7R	cagtaatacgactcactatagggagaaggctCACTTAAACATCCACTAAATAACCCA
	GNASXL	GNASXL_10F	aggaagagagGAAGGAATTTTAGATTGAGGTTGAA
		GNASXL_T7R	cagtaatacgactcactatagggagaaggctCCAAAAACAAACTCCTAAAACC
	GNAS1A	GNAS1A_000_10F	aggaagagagTGTTTTTTGGTTTGTTTTTGTTTTT
		GNAS1A_000_T7R	cagtaatacgactcactatagggagaaggctTTTAAACTTCATAACCATCTTCAACA
Pyrosequencing	ARHI-CG1	ARHI-CG1 F	AACTCCCTCTAACTTCTTTCTCCCTTACCT
		ARHI-CG1 R	Bio-GTTTATAGGGTATTGTTGTTAAAATTTGT
		ARHI-CG1 S	CTTTCTCCCTTACCTAT
	ARHI-CG2	ARHI-CG2 F	TGGATTAGTTTTTAGATTGTTGTAGATGT
		ARHI-CG2 R	Bio-CCCCAAAAACTCACTCCTCC
		ARHI-CG2 S	GGTTAGTTTTTTATAGTTGGT
	ZDBF2	ZDBF2 F	GGTTTTAAATGATTTTGGGTAGTTTG
		ZDBF2 R	Bio-CCCCTAATAACTTTATCTAACTTCTCT
		ZDBF2 S	GATTTTGGGTAGTTTGG
	NAP1L5	NAP1L5 F	AGGGTAGTAATAGGAGGAATTTGGTGTAGT
		NAP1L5 R	Bio-AAACTCCTCAACCATCTAACCAACC
		NAP1L5 S	GGGAGTTTTTTTAGATTT
	IGF2R-DMR2	IGF2R-DMR2 F	GTAGTTTTTGTTTGGTTTTTGTTTG
		IGF2R-DMR2 R	Bio-CCTATTCACACATAAAATAACCCCT
		IGF2R-DMR2 S	GAGGGATGTAGTG
	PEG10	PEG10 F	TTGGTTTAGGTGTGGGATTTT
		PEG10 R	Bio-AAACATTCTAAAATACTACTCCATCTC
		PEG10 S	AGGTGTGGGATTTTATTT
	MEST	PEG1 F	AAGGGGGTTTTGTTTTTTTAATTGTG
		PEG1 R	Bio-AACCCCACAAACTACCCACAAACC
		PEG1 S	TTGTTGTAAAGGAAATTT
	INPP5Fv2	INPP5FV2 810(-) F	GTGTTTGGTTATTTTATTATTATTGTTGGA
		INPP5FV2 750(-) R	Bio-CAAAACCCACCTCTCTACCTTTCTTATC
		INPP5FV2 810(-) S	AGTTGGGAATATTATTTGG
	H19 promoter	H19-Promoter F	GTTTGGGAGAGTTTGTGAGG
		H19-Promoter R	Bio-CCCCAAACCCATTCCCATCCAATTAAC
		H19-Promoter S	GTTTATAGTTTGTTAGTAGAGTG
	IGF2-DMR0	IGF2DMR0h2 F	TGAGGATGGGTTTTTGTTTGGTAT
		IGF2DMR0h2 R	Bio-TCCTCAATCCACCCAAAATAATAT
		IGF2DMR0h2 S	AAAAGTTATTGGATATATAGT
	IGF2-DMR2	IGF2 DMR2 F	GGTTAGGAGGAGGTTGTAGG
		IGF2 DMR2 R	Bio-CCAAAACAACTTCCCCAAATAC
		IGF2 DMR2 S	GGGTGGGTAGAGTAA
	KvDMR1	KvDMR1 F	AGGGAAGTTTTAGGGTGTGAATTTTTAGAG
		KvDMR1 R	Bio-CCAAACCACCCACCTAACAAAAAAC
		KvDMR1 S	TGGTAATGTTTGGTATTT
	WT1-AS	WT1-AS F	GGGTTTGTTTGAGGTTTTTTTATAGGATAG
		WT1-AS R	Bio-TCTTCAAACCCCTCCTACCTTAACCT
		WT1-AS S	TTTATAGGATAGTGATTTTAGATTT
	RB1	RB1 F	GGTAGGGTAGTTTTGGAAATGTTTAAG
		RB1 R	Bio-AACCACAAACCCTTACCC
		RB1 S	AGTTTTGGAAATGTTTAAGAT
	DLK1	DLK1 F	TTTGTGTTTTTTTGGGTATTTAATTATTG
		DLK1 R	Bio-TTAATACACCTTCCCTCACACTATACAACA
		DLK1 S	GTTTTTTTGGGTATTTAATTATTGT
	IG-DMR-CG4	IG-DMR-CG4 F	TTTTATTATTGAATTGGGTTTGTTAGT
		IG-DMR-CG4 R	Bio-ACAATTCCTACTACAAAATTTCAACA
		IG-DMR-CG4 S	GAATTGGGTTTGTTAGT
	IG-DMR-CG6	IG-DMR-CG6 F	ATTGTTGAGAATTGTATTTGGGTAAA
		IG-DMR-CG6 R	Bio-AACTTCCCTCACTAAACTAAACCTTACCA
		IG-DMR-CG6 S	TGGTTAGTTATAGTATTATAGGAT
	MEG3-CG7	MEG3-CG7_3 F	GTTAGGTAGGGTGAATTTAGGTATAATGTGTG
		MEG3-CG7_3 R	Bio-AACAACCTCTAACTTACATCTAAAAACCAATT
		MEG3-CG7_3 S	ATGGTTAAGGTGGGGTTG
	SNRPN	SNRPN F	CCTACCTCCCAACCACTTCCT
		SNRPN R	Bio-GGGAGATTGGGGGGGGAATT
		SNRPN S	CCCAACCACTTCCTA
	PEG3	PEG3 F	GGTGGTTTTAGGTTAGTTAGAAAGG
		PEG3 R	Bio-ACCAAACTATAAATAATTAATACCTTTT
		PEG3 S	AGATTTTGTAGTAGTTTTTTAGATT
	MCTS2-CG	MCTS2-CG F	AGTTTTTTGTTTAGGTAAGGAGAAAGTAT
		MCTS2-CG R	Bio-ACAAAACTCCCATAAAATCCCCTACAA
		MCTS2-CG S	ATTGGAGAGGAATTAGTAG
	NNAT	NNAT F	GGGGAGAGGAAGATTGAGGT
		NNAT R	ACCCCTTTCAAAAACTTTAACAT
		NNAT S	ATTTTTAAGTATATTTTAATTATT
	L3MBTL-CG3	L3MBTL-CG3 F	TATGAGGAGAAGAGAGGGTTATGGTAT
		L3MBTL-CG3 R	Bio-AAAACCCAACTCAAAACCTAAAAAAC
		L3MBTL-CG3 S	GGGAGTAGTAATTTTTAGATTTTTT
	NESP	NESP55 F	TTTTTTTTGGGGTTTTGGGGTTTTT
		NESP55 R	Bio-AACAAACCTTAAACTATCCCTCCCC
		NESP55 S	TGGAGTGTTTGGGTATTA
	NESPAS	NESPAS F	GGATATGGGTGGGAGGTTTAA
		NESPAS R	Bio-CCCTAAAACCCCACCTCTC
		NESPAS S	GGGTGGGAGGTTTAATA
	GNASXL	GNASXL F	GGGTTTTTGGAGTTAGGAGTAGG
		GNASXL R	Bio-CAACCCCTCTTCCTTAATCTATCC
		GNASXL S	GTTTTTTGGTGGTAGAG
	GNAS 1A	GNAS 1A F	TGTTGAAGATGGTTATGAAGTTTAAAGTT
		GNAS 1A R	Bio-TATCCCAATCAACCCAAACCCTACTC
		GNAS 1A S	AAGTTTAGGAGGAGGTT
	LINE1	LINE1 F	TTTTGAGTTAGGTGTGGGATATA
		LINE1 R	Bio-AAAATCAAAAAATTCCCTTTC
		LINE1 S	AGTTAGGTGTGGGATATAGT
SNP Typing	H19-DMR	h06f	GAGGAGATACTAGGGGAACAATGAG					rs11564736, rs10732516, rs2071094
		h19br	CACGGGGCTGTGGATAATGC
	KCNQ1DN	SMS4-3	ATCCTGGTGAAGCCACACCC					rs2239897
		SMS4-4	TGAGGCTGGCCGTTTAAAG
Bisulphite Sequencing	H19-DMR	H19 BS1	GAGTTYGGGGGTTTTTGTATAGT					rs34610866,rs2071094
		H19 BS2	TAAATAATACCCRACCTAAAAATCTAA
HOT STOP COBRA	H19-DMR	FFPE H19-DMR COBRA F1	GGAATTGGTTGTAGTTGTGG
		FFPE H19-DMR COBRA R2	ATCCTATTCCCAAATAACCC
Microsatellite	ARHI (DIRAS3)	D1S390 F	FAM-CTCTAGCTTGGGTGACAGA
		D1S390 R	AGCCTCTAAATGCAAGTCAG
	ZDBF2	D2S1239 F	NED-ATTACACTCCAGCCTGGCG
		D2S1239 R	TTTCCTCAGTCCTGCCCTG
	NAP1L5	D4S1519 F	FAM-AGATATCCGATACTTGTGGG
		D4S1519 R	TGAAGAATGGACTAATACACC
	IGF2R-DMR2	D6S393 F	VIC-AAGAGTGGGTTGTATTAGTCA
		D6S393 R	GGCAAATCTAAGAGCTATCTG
		D6S980 F	NED-AGGGAGCCGAGATTGCAC
		D6S980 R	CTGAAGGGTGAGGAGTTTCT
	PEG10	D7S796 F	VIC-TTTTGGTATTGGCCATCCTA
		D7S796 R	GAAAGGAACAGAGAGACAGGG
	MEST	D7S1804 F	NED-TTCAAGTGGTTGGGTTCACT
		D7S1804 R	TGGGTCTAGTCCAGTGGTGT
	INPP5Fv2	D10S521 F	FAM-CTCCAGAGAAAACAGACCAA
		D10S521 R	CCTACCATCAATCAACTGAG
	WT1AS	D11S2001 F	FAM-TTGGTTAAGAATGGAAATTCC
		D11S2001 R	TGAAATCACCTAATGGTGGG
	KvDMR1 (LIT1)	D11S1997 F	NED-TTTGTTTTCCTAAGAAAGATAAAGC
		D11S1997 R	CTGGACAAAATAAAGACCAGC
	IGF2	HUMTH01 F	FAM-CAGCTGCCCTAGTCAGCAC
		HUMTH01 R	GCTTCCGAGTGCAGGTCACA
	H19	D11S1984 F	FAM-GGGTGACAGAGCAAAATTCT
		D11S1984 R	ACACCTGGATCTTGGACTCA
	RB1	D13S318 F	VIC-GTATGATTTATTTCAGGTTTGCA
		D13S318 R	TTTGATTTCATTGTCTACTGACA
	MEG3, IG DMR	D14S606 F	PET-AGGGGTCAGACTCTGTTAAGC
		D14S606 R	GTCTTCAATGTTTTAACTTTGTGG
	PEG3 (ZIM2)	D19S589 F	FAM-GCGAAGGCCATTAATTTCTT
		D19S589 R	AATATGGAACCAGCCCAAAT
	MCTS2 (PSIMCT-1), NNAT, L3MBTL	D20S438 F	FAM-GAGTATCCAGAGAGCTATTA
		D20S438 R	ATTACAGTGTGAGACCCTG
	NESP, GNASXL, GNAS1A	D20S158 F	VIC-GAGGCTGCAGTGGGTCATG
		D20S158 R	ATTCTCACGTTCGCCCCTC
F: forward primer, R: reverse primer, S: sequence primer. Small letter sequence in Maldi-TOF MS reverse primer includes T7 promoter. Bio: biotinylated reverse primer. FAM, VIC, NED, PET: fluorescent label
F: forward primer, R: reverse primer, S: sequence primer. The small letter sequence in a MALDI-TOF MS reverse primer includes T7 promoter. The small letter sequence in a Maldi-TOF MS forward primer is added according to the manufacturer's protocol. Bio: biotinylated reverse primer. FAM, VIC, NED, PET: fluorescent label
